# Supplementary material for: Sorption of small molecule vapours by single crystals of [Pt{4′-(Ph)trpy}(NCS)]SbF6 where trpy = 2,2′:6′,2′′-terpyridine: a porous material with a structure stabilised by extended π–π interactions
Source: Royal Society of Chemistry journal article supplement (doi:10.1039/c2dt12398c), 2012-01-01
Supplement: c2dt12398c.pdf [file c2dt12398c.pdf]

## Supporting Information

**Sorption of small molecule vapours by single crystals of [Pt{4'-(Ph)trpy}(NCS)]SbF<sub>6</sub> where trpy = 2,2':6',2''-terpyridine: a porous material with a structure stabilised by extended  $\pi$ - $\pi$  interactions**

**John S. Field,\* Orde Q. Munro and Bradley P. Waldron**

*School of Chemistry, University of KwaZulu-Natal, Private Bag X01, Pietermaritzburg, 3201, South Africa.*

### Supporting Information Table of Contents

|                          |                                                                                                                                                                                                                                                                                                                                                                                                                                                   |    |
|--------------------------|---------------------------------------------------------------------------------------------------------------------------------------------------------------------------------------------------------------------------------------------------------------------------------------------------------------------------------------------------------------------------------------------------------------------------------------------------|----|
| <b>Title</b>             |                                                                                                                                                                                                                                                                                                                                                                                                                                                   | S1 |
| <b>Table of contents</b> |                                                                                                                                                                                                                                                                                                                                                                                                                                                   | S2 |
| <b>Figure S1</b>         | View down the [c]-axis showing the unit cell contents of <b>1</b> ·CH <sub>3</sub> CN. The [b]-axis points downwards.                                                                                                                                                                                                                                                                                                                             | S3 |
| <b>Figure S2</b>         | View down the [c]-axis showing the unit cell contents of <b>1</b> ·CH <sub>3</sub> OH. The [b]-axis points downwards.                                                                                                                                                                                                                                                                                                                             | S4 |
| <b>Figure S3</b>         | View down the [c]-axis showing the unit cell contents of <b>1</b> ·(CH <sub>3</sub> ) <sub>2</sub> CO. The [b]-axis points downwards.                                                                                                                                                                                                                                                                                                             | S5 |
| <b>Figure S4</b>         | Comparison of the experimentally measured 295 K powder XRD spectrum of <b>1</b> (where the powder was obtained by crushing single crystals of <b>1</b> ) with the spectrum calculated from a single crystal structure determination of <b>1</b> also at 295 K. The 2θ ranges are 5-23° in (A) and 23-40° in (B).                                                                                                                                  | S6 |
| <b>Figure S5</b>         | Solid state emission spectrum recorded at 77 K of <b>1</b> ·CH <sub>3</sub> OH, deconvoluted into five constituent Gaussian bands ( $r^2 = 0.9990$ ; fit std error = 35.29). Components due to <sup>3</sup> MLCT emission are shown in blue, light-blue and pink, to <sup>3</sup> MMLCT emission in green and to excimeric π-π* emission in red. The observed spectrum is shown by the orange line and the calculated spectrum by the black line. | S7 |
| <b>CheckCIF report</b>   | Structural check for crystal of <b>1</b> ·(CH <sub>3</sub> ) <sub>2</sub> CO obtained by exposure of <b>1</b> to vapours of acetone.                                                                                                                                                                                                                                                                                                              | S8 |

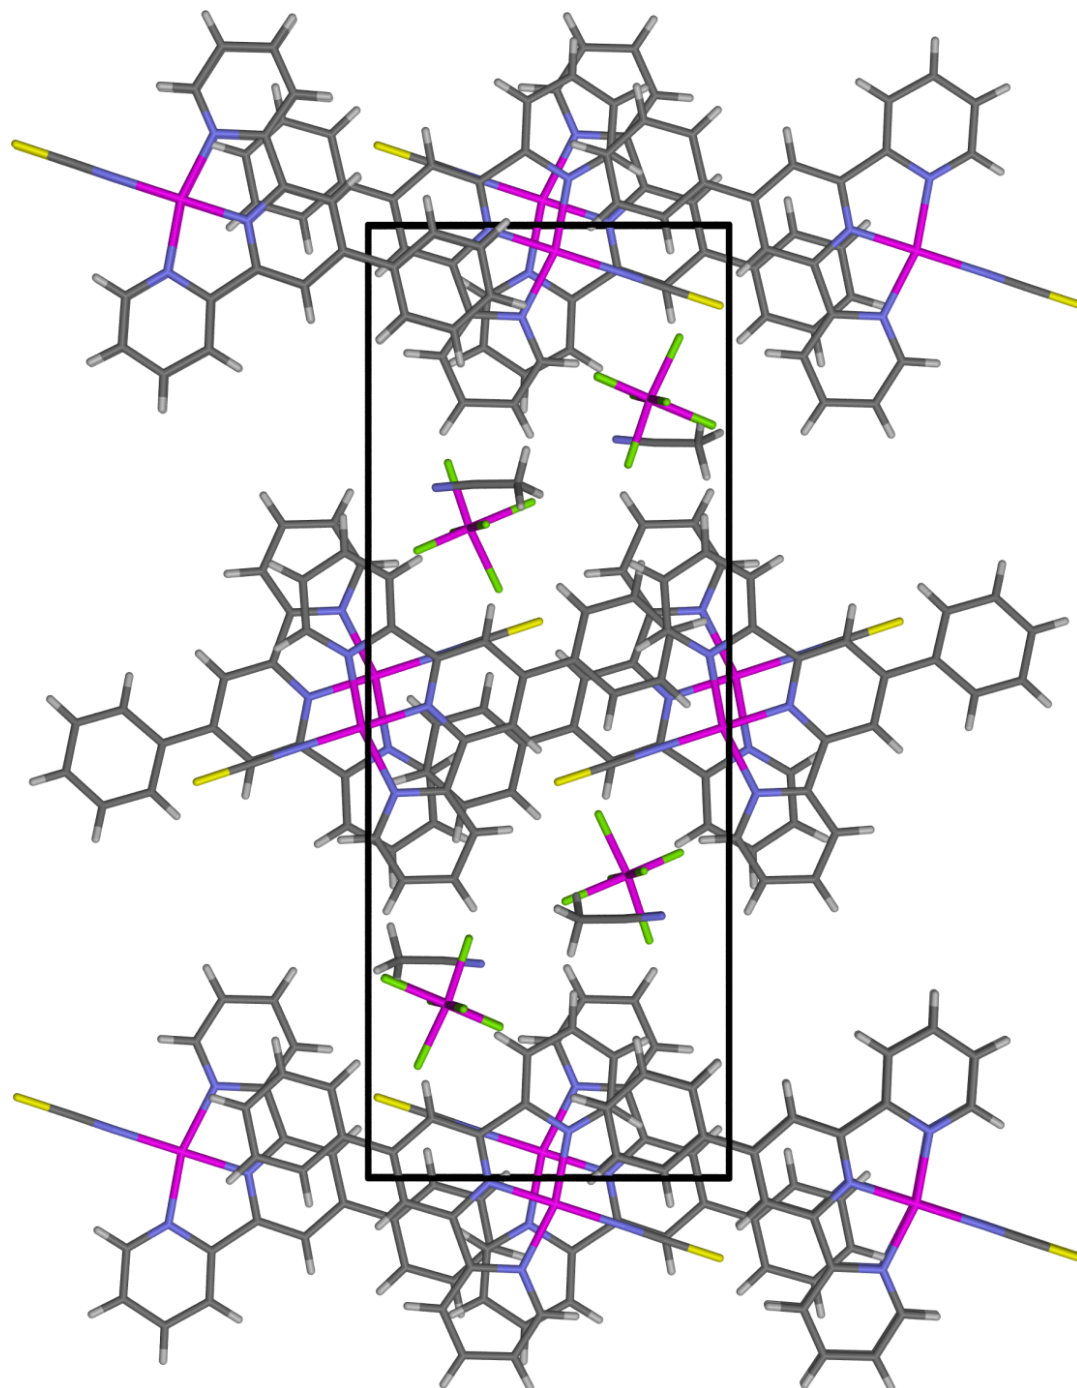

**Figure S1** View down the [c]-axis showing the unit cell contents of **1·CH<sub>3</sub>CN**. The [b]-axis points downwards.

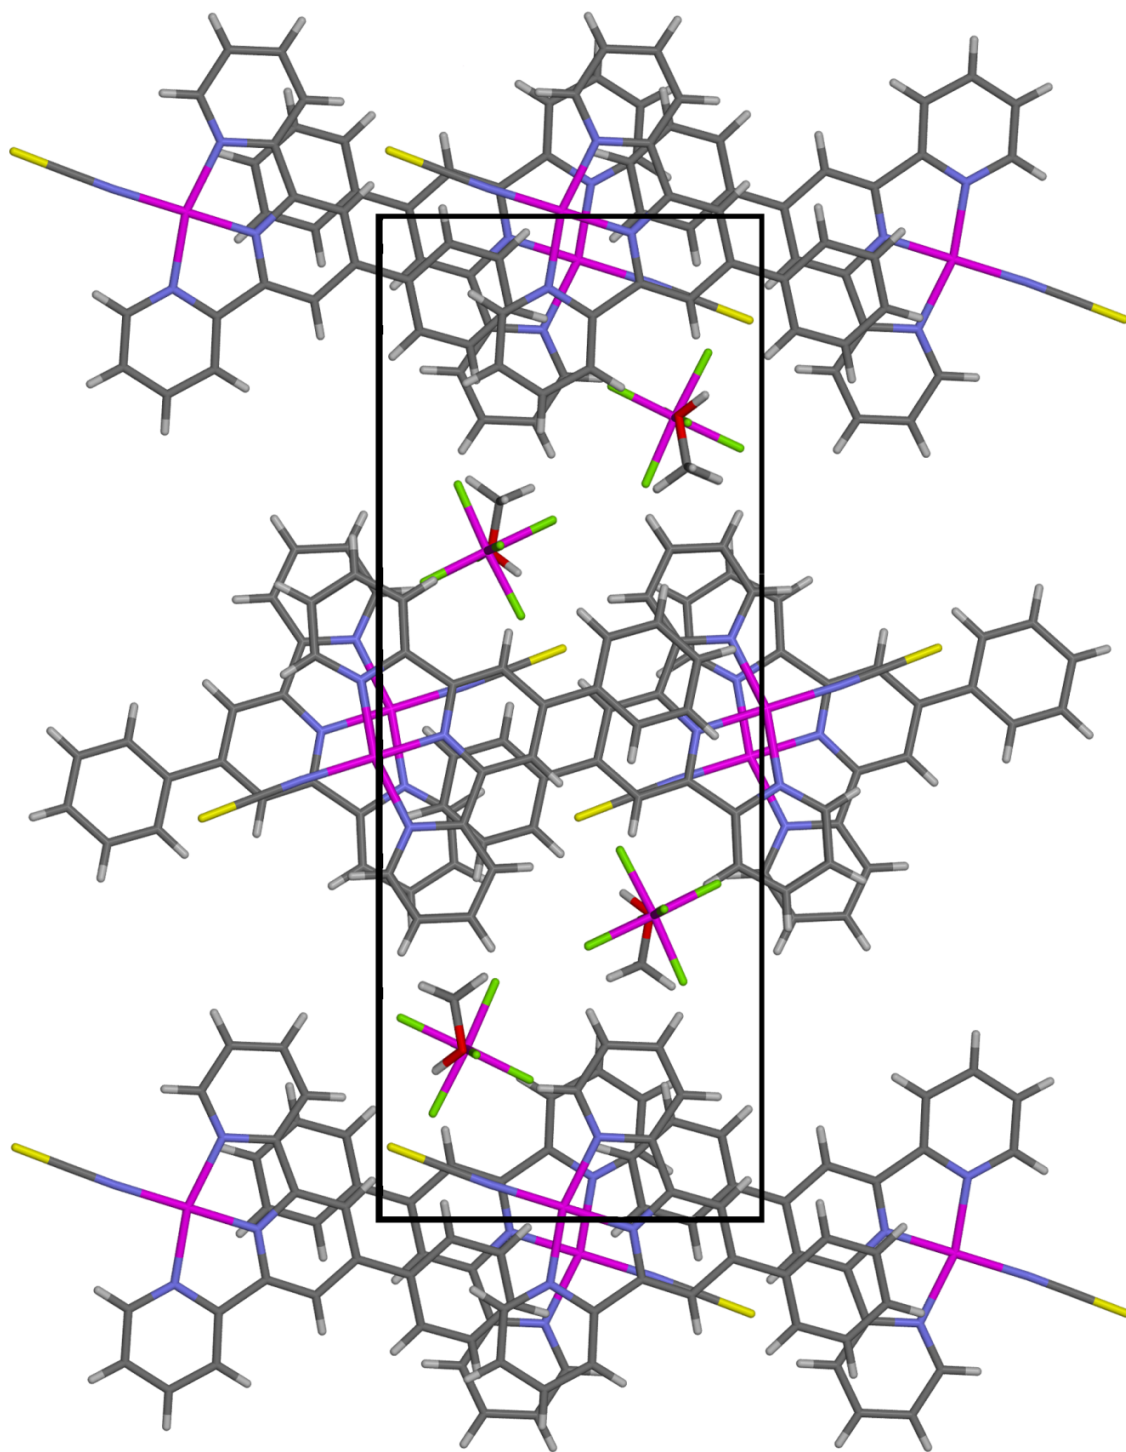

**Figure S2** View down the [c]-axis showing the unit cell contents of **1·CH<sub>3</sub>OH**. The [b]-axis points downwards.

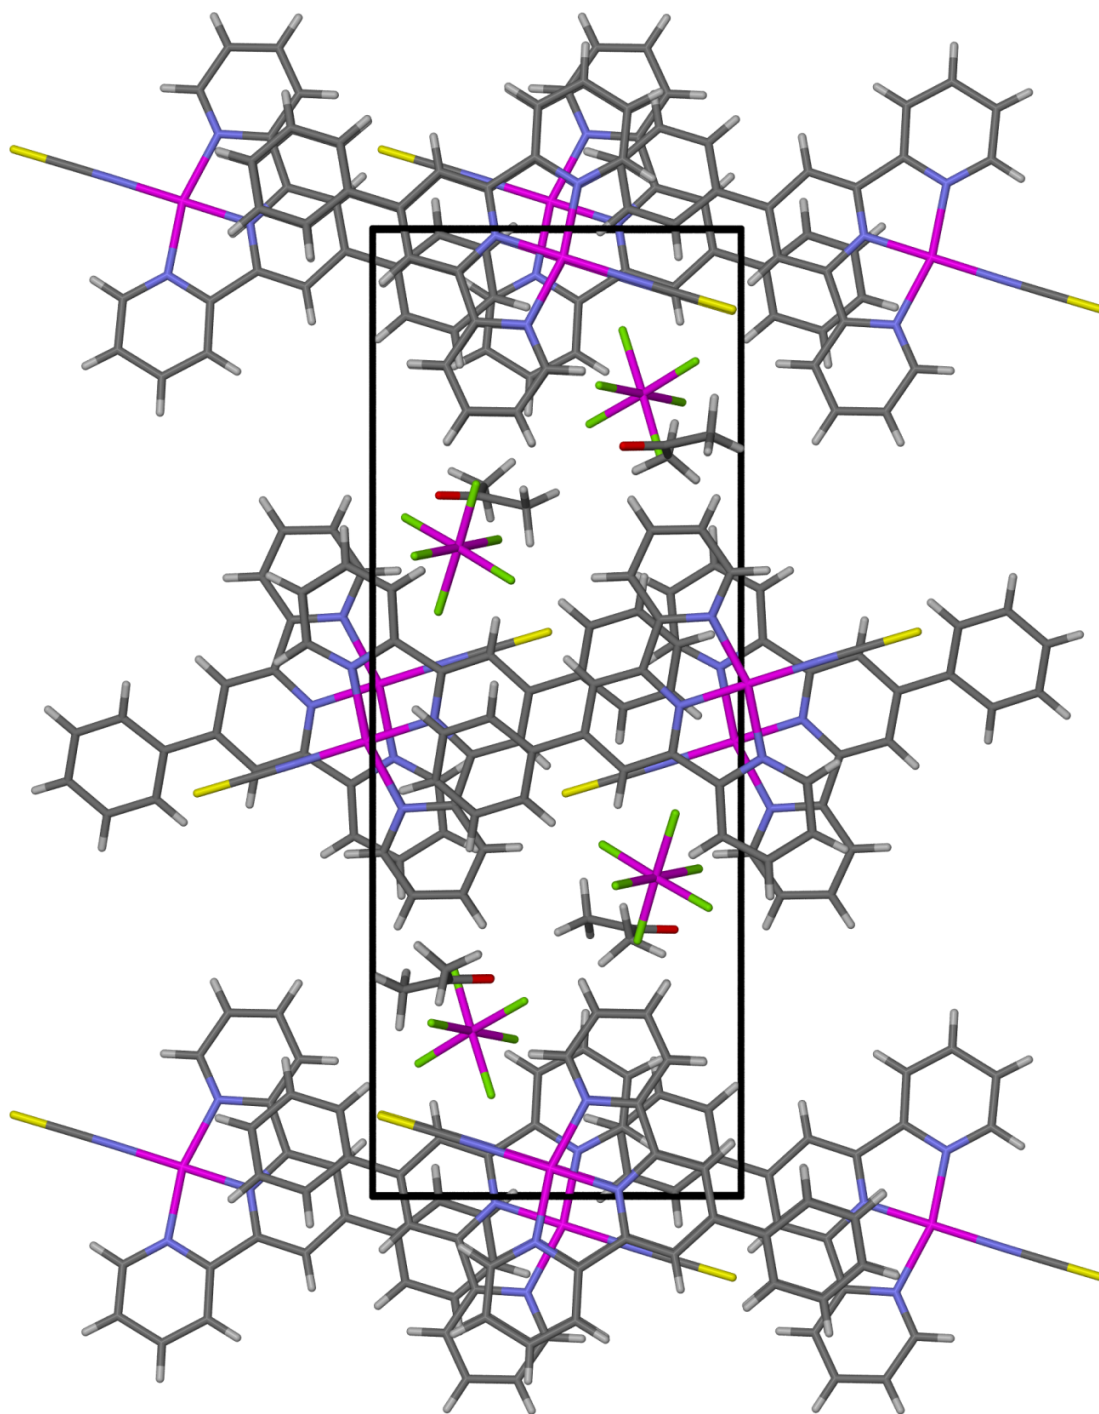

**Figure S3** View down the [c]-axis showing the unit cell contents of  $1 \cdot (\text{CH}_3)_2\text{CO}$ . The [b]-axis points downwards.

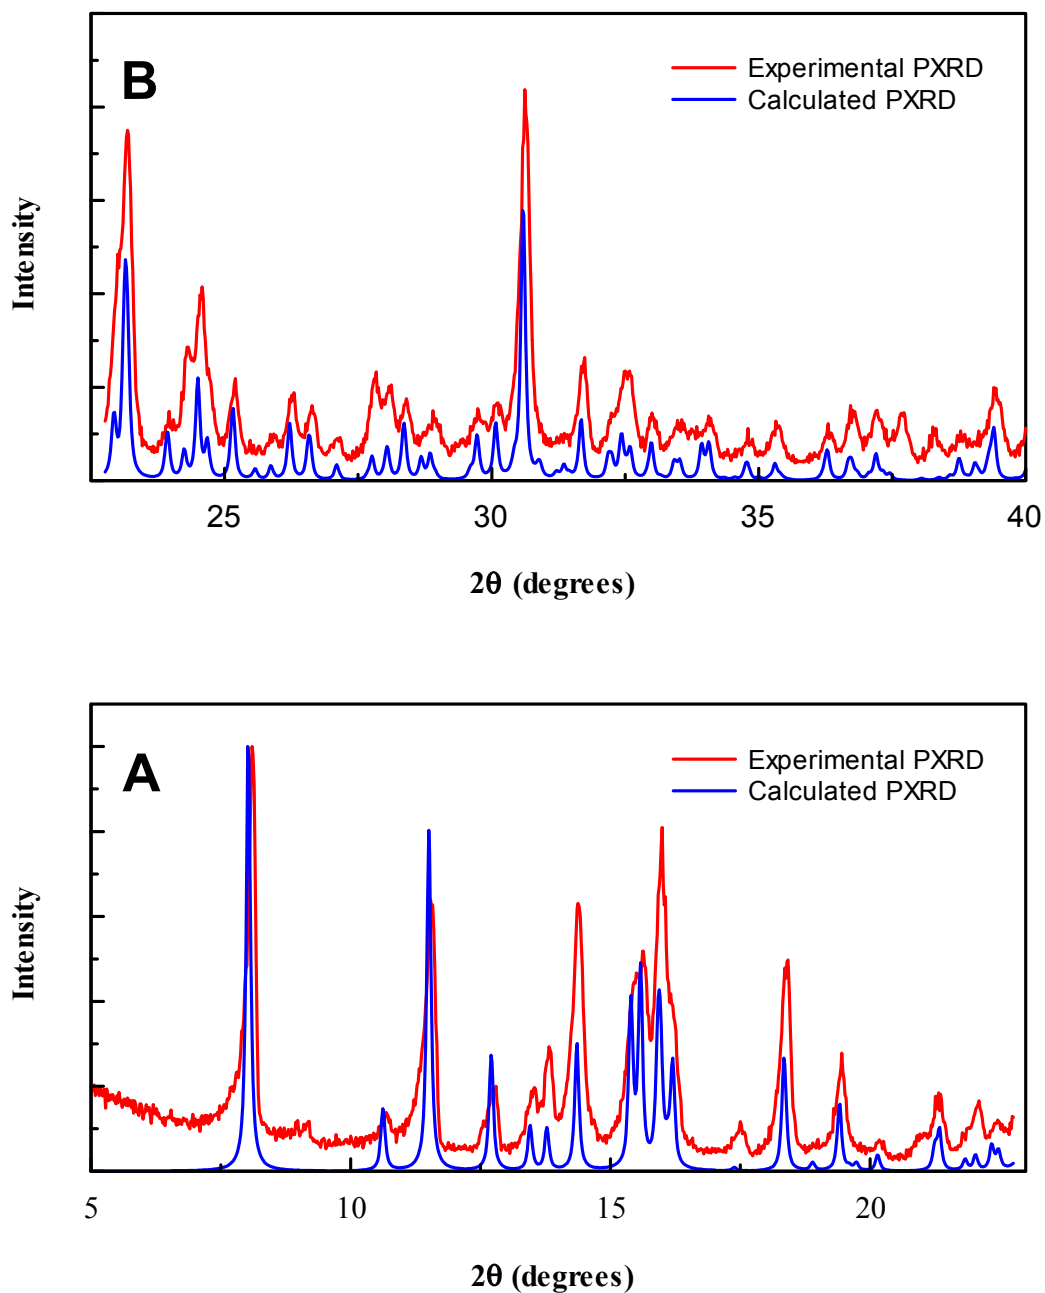

**Figure S4** Comparison of the experimentally measured 295 K powder XRD spectrum of **1** (where the powder was obtained by crushing single crystals of **1**) with the spectrum calculated from a single crystal structure determination of **1** also at 295 K: see **1\_295K.cif** in the Supplementary Data. The  $2\theta$  ranges are 5-23° in (A) and 23-40° in (B).

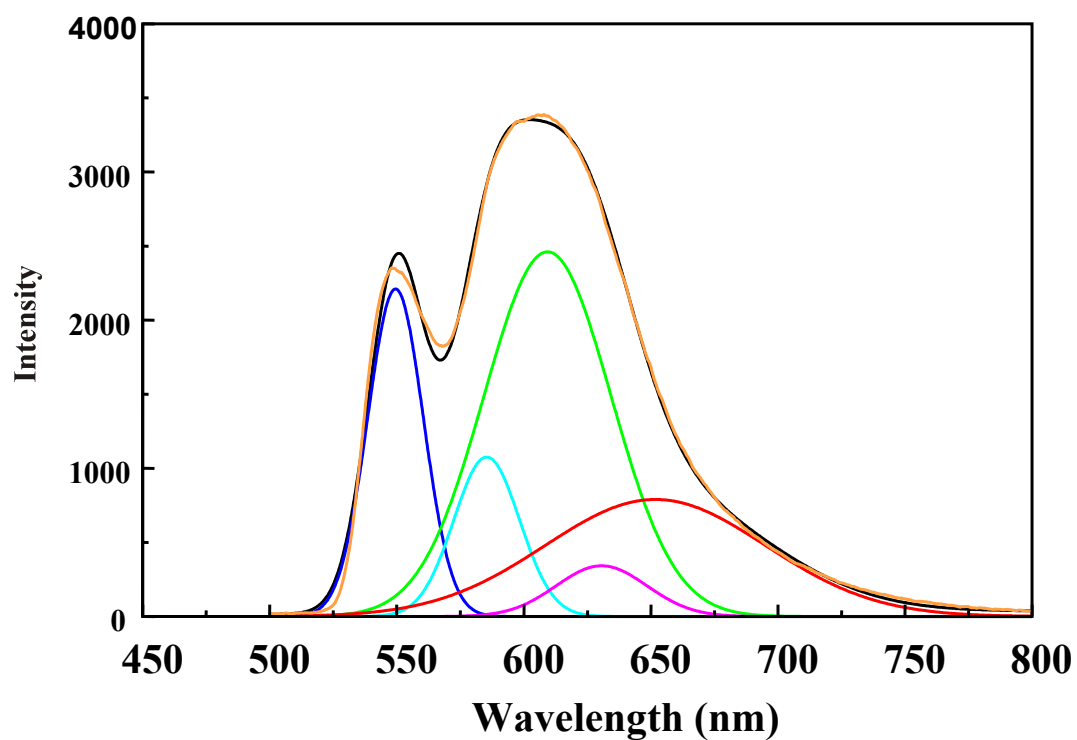

**Figure S5** Solid state emission spectrum recorded at 77 K of **1-CH<sub>3</sub>OH**, deconvoluted into five constituent Gaussian bands ( $r^2 = 0.9990$ ; fit std error = 35.29). Components due to <sup>3</sup>MLCT emission are shown in blue, light-blue and pink, to <sup>3</sup>MMLCT emission in green and to excimeric  $\pi$ - $\pi^*$  emission in red. The observed spectrum is shown by the orange line and the calculated spectrum by the black line.

# checkCIF/PLATON report (basic structural check)

No syntax errors found.  
Please wait while processing ....  
[report](#)

[CIF dictionary](#)  
[Interpreting this](#)

## Datablock: 1Me2CO\_exp

---

|                 |                                         |                    |
|-----------------|-----------------------------------------|--------------------|
| Bond precision: | C-C = 0.0326 Å                          | Wavelength=0.71073 |
| Cell:           | a=9.8258(11) b=25.4680(3) c=10.9263(12) |                    |
|                 | alpha=90 beta=98.527(9) gamma=90        |                    |
| Temperature:    | 200 K                                   |                    |

  

|                        | Calculated                      | Reported                        |
|------------------------|---------------------------------|---------------------------------|
| Volume                 | 2704.0(4)                       | 2704.0(4)                       |
| Space group            | P 21/n                          | P2(1)/n                         |
| Hall group             | -P 2yn                          | -P 2yn                          |
| Moiety formula         | C22 H15 N4 Pt S, C3 H6 O, F6 Sb | C22 H15 N4 Pt S, C3 H6 O, F6 Sb |
| Sum formula            | C25 H21 F6 N4 O Pt S Sb         | C25 H21 F6 N4 O Pt S Sb         |
| Mr                     | 856.37                          | 856.36                          |
| Dx, g cm <sup>-3</sup> | 2.104                           | 2.104                           |
| Z                      | 4                               | 4                               |
| Mu (mm <sup>-1</sup> ) | 6.313                           | 6.312                           |
| F000                   | 1624.0                          | 1624.0                          |
| F000'                  | 1616.35                         |                                 |
| h,k,lmax               | 12,31,13                        | 11,31,13                        |
| Nref                   | 5393                            | 5158                            |
| Tmin,Tmax              | 0.240,0.388                     | 0.161,0.388                     |
| Tmin'                  | 0.073                           |                                 |

Correction method= AbsCorr=MULTI-SCAN

Data completeness= Ratio = 0.956 Theta(max)= 26.130

R(reflections)= 0.1002( 3484) wR2(reflections)= 0.2037( 5158)

S = 1.608 Npar= 352

---

The following ALERTS were generated. Each ALERT has the format  
**test-name ALERT alert-type alert-level**.  
Click on the hyperlinks for more details of the test.

---

### ● Alert level A

[PLAT211 ALERT 2 A](#) ADP of Atom C17 is NPD .....

?

---

### ● Alert level B

[SHFSU01 ALERT 2 B](#) The absolute value of parameter shift to su ratio > 0.10



Absolute value of the parameter shift to su ratio given  
0.182  
Additional refinement cycles may be required.  
[PLAT080 ALERT 2 B](#) Maximum Shift/Error .....  
0.18  
[PLAT213 ALERT 2 B](#) Atom N2 has ADP max/min Ratio .....  
4.20 oblat  
[PLAT342 ALERT 3 B](#) Low Bond Precision on C-C Bonds (x 1000) Ang ...  
33

---

### ●Alert level C

[RFACG01 ALERT 3 C](#) The value of the R factor is > 0.10  
R factor given 0.100  
[PLAT029 ALERT 3 C](#) \_diffn\_measured\_fraction\_theta\_full Low .....  
0.97  
[PLAT213 ALERT 2 C](#) Atom C15 has ADP max/min Ratio .....  
3.30 prola  
[PLAT214 ALERT 2 C](#) Atom C25 (Anion/Solvent) ADP max/min Ratio  
5.00 prola  
[PLAT362 ALERT 2 C](#) Short C(sp<sup>3</sup>)-C(sp<sup>2</sup>) Bond C23 - C25 ...  
1.41 Ang.  
[PLAT432 ALERT 2 C](#) Short Inter X...Y Contact F6 .. C1 ..  
2.89 Ang.  
[PLAT244 ALERT 4 C](#) Low 'Solvent' Ueq as Compared to Neighbors for  
C23  
[PLAT244 ALERT 4 C](#) Low 'Solvent' Ueq as Compared to Neighbors for  
Sb

---

1 **ALERT level A** = In general: serious problem  
4 **ALERT level B** = Potentially serious problem  
8 **ALERT level C** = Check and explain  
0 **ALERT level G** = General alerts; check

0 ALERT type 1 CIF construction/syntax error, inconsistent or  
missing data  
8 ALERT type 2 Indicator that the structure model may be wrong or  
deficient  
3 ALERT type 3 Indicator that the structure quality may be low  
2 ALERT type 4 Improvement, methodology, query or suggestion  
0 ALERT type 5 Informative message, check

---

### Publication of your CIF in IUCr journals

A basic structural check has been run on your CIF. These basic checks will be run on all CIFs submitted for publication in IUCr journals (*Acta Crystallographica*, *Journal of Applied Crystallography*, *Journal of Synchrotron Radiation*). If you intend to submit to *Acta Crystallographica Section C* or *E*, you should make sure that [full publication checks](#) are passed on the final version of your CIF prior to submission.

### Publication of your CIF in other journals

Please refer to the *Notes for Authors* of the relevant journal for any special instructions relating to CIF submission.

---

PLATON version of 29/04/2008; check.def file version of 22/04/2008

### Datablock 1Me2CO\_exp - ellipsoid plot

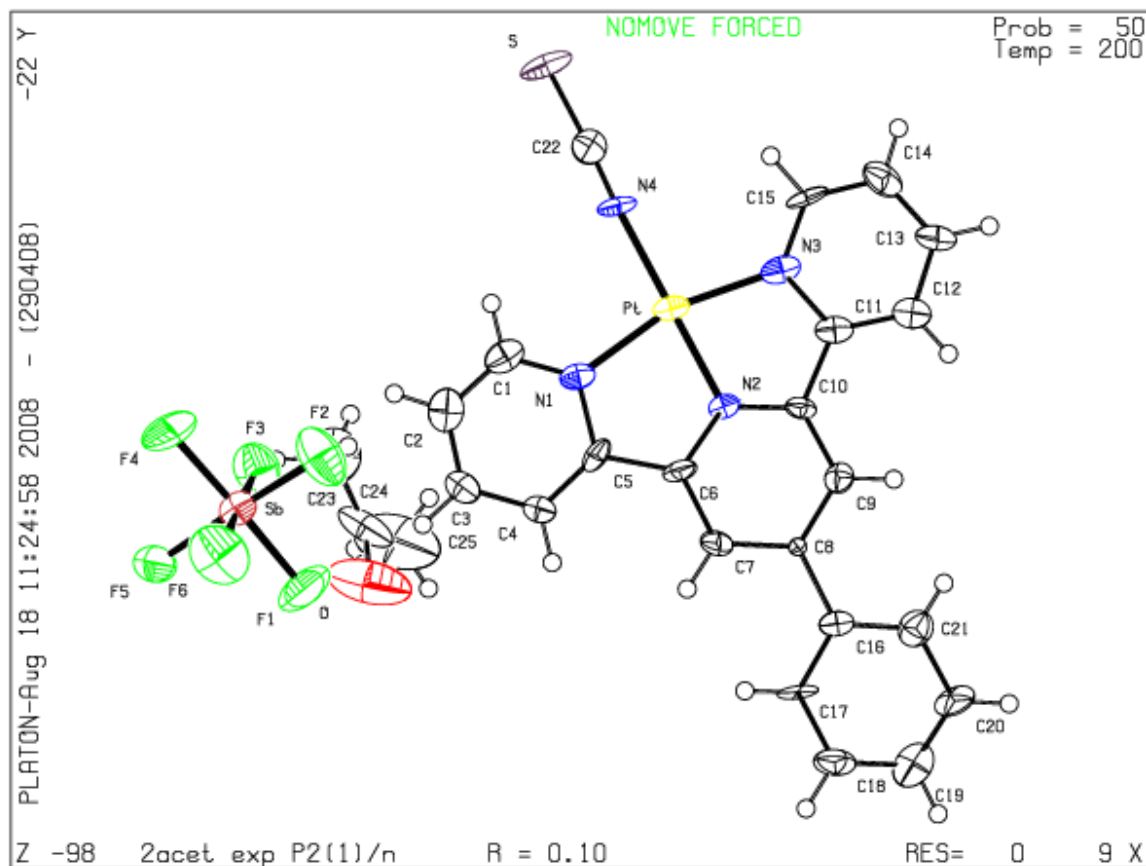

[Download CIF editor \(pubCIF\) from the IUCr](#)  
[Download CIF editor \(enCIFer\) from the CCDC](#)  
[Test a new CIF entry](#)
